# Supplementary material
Source: PubMed Central journal article supplement (PMC3399773)
Supplement: NIHMS49012-supplement-1.pdf [file NIHMS49012-supplement-1.pdf]

## **Supporting Information:**

Do plant cyclotides have a potential as immunosuppressant peptides?

**Carsten Gründemann<sup>†</sup>, Johannes Koebach<sup>‡</sup>, Roman Huber<sup>†</sup> and  
Christian W Gruber<sup>‡,\*</sup>**

<sup>†</sup>Center for Complementary Medicine, Department of Environmental Health Sciences,  
University Medical Center Freiburg, Breisacher Str. 115B, D-79111 Freiburg, Germany

<sup>‡</sup>Medical University of Vienna, Center for Physiology and Pharmacology, Schwarzspanierstr.  
17, A-1090 Vienna, Austria

**Supplemental Figure S1. Structural alignment of kalata B1 and kalata B2.** The NMR solution structures of kalata B1 shown in blue (PDB code: 1NB1) and kalata B2 shown in red (1PT4) were structurally aligned using PyMol. Alignment of all atoms (**A**) results in an RMSD of 0.725 Å (only the five differing residues are highlighted in colour, the remaining residues are shown in grey) and the backbone atoms (**B**) fit to a RMSD of 0.599 Å. The sequences of both cyclotides are shown below the aligned structures with differing residues indicated in grey boxes and different colours.

**A**

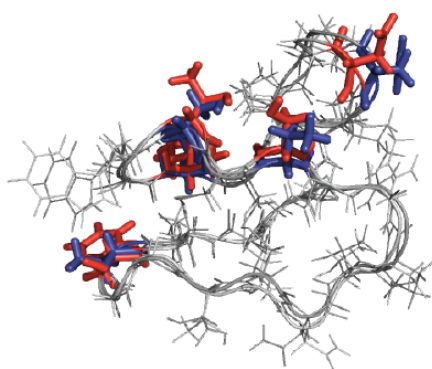

**B**

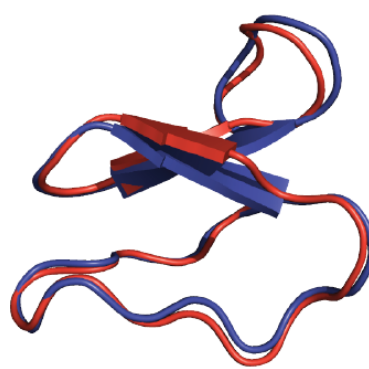

|           |           |   |           |   |   |   |   |     |   |
|-----------|-----------|---|-----------|---|---|---|---|-----|---|
| kalata B1 | GLPVCGETC | V | GGTCNTPGC | T | S | W | V | CTR | N |
| kalata B2 | GLPVCGETC | F | GGTCNTPGC | S | T | W | I | CTR | D |

**Supplemental Figure S2. Determination of IC<sub>50</sub> for anti-proliferative effect of kalata B1 on activated human PBMC.** The IC<sub>50</sub> of the anti-proliferative effects of kalata B1 (see Figure 4) has been determined by non-linear regression analysis (log inhibitor vs. normalized response) using GraphPad Prism.

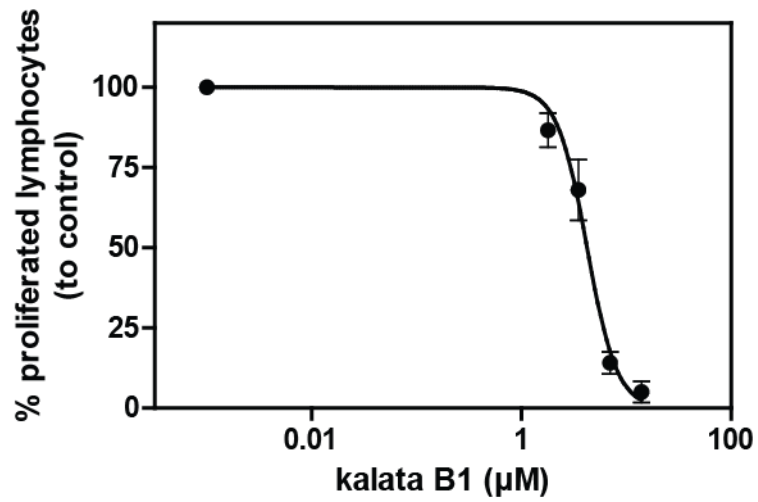

**Supplemental Figure S3. Effects of melittin on cell proliferation and cytotoxicity of activated human PBMC.**

Antibody (anti-CD3/CD28 mAbs)-activated human primary lymphocytes were cultured in the presence of medium (ctrl), camptothecin (CPT, 30  $\mu\text{g/mL}$ ), Triton-X 100 (T-x) or different concentrations of melittin (0.05-1.6  $\mu\text{M}$ ) for flow cytometric analysis of cell division (A), “subG1” DNA content (B) or apoptotic (C) and necrotic (D) cell content. For apoptotic and necrotic detection cells were stained with annexin V and propidium iodide to assess the percentages of viable (annexin V<sup>-</sup>/PI<sup>-</sup>), apoptotic (annexin V<sup>+</sup>/PI<sup>-</sup> or annexin V<sup>+</sup>/PI<sup>+</sup>) and necrotic (annexin V<sup>-</sup>/PI<sup>+</sup>) cells. Data are presented as mean  $\pm$  SEM of three to four independent experiments. n.d. = not detectable.

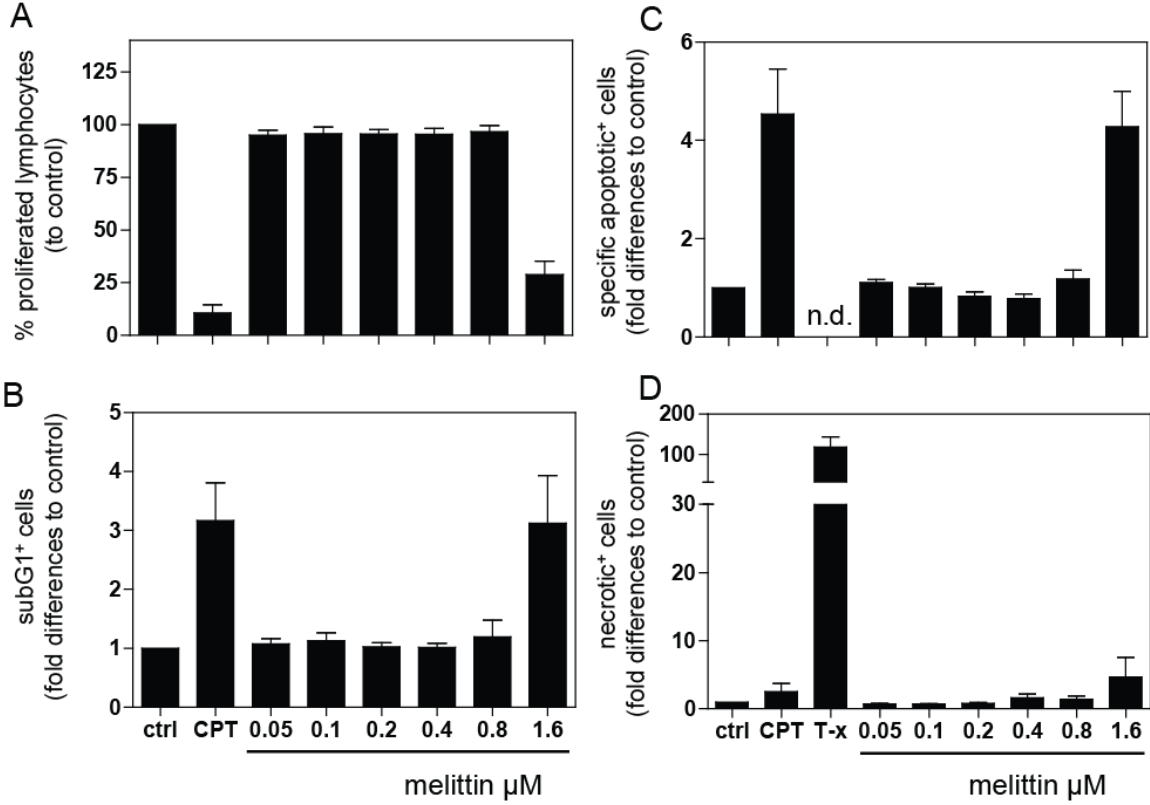

**Supplemental Table S1. Comparison of kalata B1 (and other cyclotides) inhibitory effects in various test systems.**

| Assay system                | Cells                                    | IC <sub>50</sub> (μM) | Reference <sup>#</sup> |
|-----------------------------|------------------------------------------|-----------------------|------------------------|
| <b>kalata B1</b>            |                                          |                       |                        |
| Anti-proliferative activity | human peripheral blood mononuclear cells | 3.9 ± 0.5             | this study             |
| Nematocidal activity        | <i>H. contortus</i> nematodes            | 2.7                   | Huang et al., 2010     |
|                             | <i>T. colibriformis</i> nematodes        | 4.5                   | Huang et al., 2010     |
| Cytotoxicity                | human T-lymphoblast cells                | 3.5                   | Daly et al., 2004      |
| <b>other cyclotides*</b>    |                                          |                       |                        |
| Cytotoxicity                | human lymphoma cell line (U-937)         | 0.6 - 6               | Svangard et al., 2004  |
|                             |                                          | 0.3 - 7               | Lindholm et al., 2002  |
| Cytotoxicity                | human myeloma cell line (RPMI-8226/s)    | 1 - 4                 | Svangard et al., 2004  |
|                             |                                          | 0.1 - 6               | Lindholm et al., 2002  |

\*Activity was reported of various cyclotides (varv A, varv E, varv F, vitri A, cycloviolacin O2) from *Viola arvensis*, *V. odorata* and *V. tricolor*; References can be found in the main manuscript

**Supplemental File 1. LC-MS reconstruct of *O. affinis* cyclotides.** Excel spreadsheet (XLS) containing the raw (labelled) data of LC-MS reconstruct of *O. affinis* extracts as analysed by nano LC-MS. Presented as Adobe Acrobat file (PDF).

**LC-MS reconstruct, EMS 1000 Da/sec**

Reconstruct 2700-3500 Da, signal-to-noise: 4, 25, 50; combined datasets from at least 3 independent LC-MS runs  
 CyBase comparison: MW +/- 1 Da

\*=other cyclotide detected (not Oaffinis)

\*\*=MW +/-2 Da

| No. | cyclotide          | Mass      |            | Score  | Evidence | Theoretical Mass | Δ Mass |
|-----|--------------------|-----------|------------|--------|----------|------------------|--------|
|     |                    | Da (avg.) | Da (mono.) |        |          |                  |        |
| 1   | new                | 2706,63   | 2704,37    | 0,9997 | I        |                  |        |
| 2   | new                | 2723,22   | 2721,27    | 1      | I        |                  |        |
| 3   | kalata b1-1        | 2724,12   | 2722,28    | 1      | IC       | 2724,18          | 0,0559 |
| 4   | new                | 2821,78   | 2819,36    | 1      | IC       |                  |        |
| 5   | new                | 2822,30   | 2820,55    | 0,9995 | I        |                  |        |
| 6   | new                | 2833,30   | 2831,41    | 1      | I        |                  |        |
| 7   | [L2A] kalata B1    | 2851,88   | 2849,54    | 1      | IC       | 2850,25          | 1,6322 |
| 8   | Ac-[desGly]-KB1-Am | 2854,31   | 2851,68    | 0,9996 | I        | 2853,3           | 1,0072 |
| 9   | new                | 2873,73   | 2871,13    | 0,9996 | I        |                  |        |
| 10  | kalata S           | 2878,81   | 2875,93    | 0,9993 | I        | 2878,30          | 0,5141 |
| 11  | new                | 2879,82   | 2877,46    | 1      | IC       |                  |        |
| 12  | kalata B12**       | 2882,30   | 2880,83    | 0,9969 | I        | 2880,27          | 2,0256 |
| 13  | kalata B11         | 2884,48   | 2881,44    | 0,9999 | I        | 2884,26          | 0,2236 |
| 14  | new                | 2891,45   | 2888,50    | 1      | IC       |                  |        |
| 15  | kalata B1          | 2892,85   | 2890,39    | 1      | IC       | 2892,33          | 0,5228 |
| 16  | kalata B4          | 2893,24   | 2890,56    | 1      | I        | 2893,31          | 0,0718 |
| 17  | new*               | 2896,70   | 2894,45    | 0,9999 | I        |                  |        |
| 18  | new                | 2897,11   | 2894,57    | 1      | IC       |                  |        |
| 19  | [G-A] kalata B1    | 2906,47   | 2904,75    | 0,9995 | I        | 2906,35          | 0,1191 |
| 20  | new                | 2909,53   | 2906,90    | 1      | IC       |                  |        |
| 21  | acyclic kalata B1  | 2911,32   | 2908,36    | 1      | IC       | 2910,35          | 0,9675 |
| 22  | new*               | 2912,90   | 2911,43    | 0,9999 | I        |                  |        |
| 23  | new*               | 2922,95   | 2920,48    | 1      | IC       |                  |        |
| 24  | new*               | 2925,32   | 2922,40    | 1      | IC       |                  |        |
| 25  | new*               | 2926,80   | 2923,70    | 1      | IC       |                  |        |
| 26  | new                | 2927,30   | 2924,66    | 1      | IC       |                  |        |
| 27  | new                | 2937,91   | 2935,50    | 0,9998 | I        |                  |        |
| 28  | new                | 2942,99   | 2940,48    | 1      | IC       |                  |        |
| 29  | kalata B2          | 2956,14   | 2953,74    | 1      | IC       | 2955,38          | 0,7637 |
| 30  | new*               | 2959,95   | 2957,56    | 1      | IC       |                  |        |
| 31  | new                | 2960,36   | 2958,24    | 0,9996 | I        |                  |        |
| 32  | new                | 2969,25   | 2968,13    | 0,9997 | I        |                  |        |
| 33  | new*               | 2971,44   | 2969,50    | 1      | IC       |                  |        |
| 34  | new                | 2973,80   | 2970,55    | 1      | IC       |                  |        |
| 35  | new                | 2974,14   | 2971,51    | 1      | IC       |                  |        |
| 36  | new*               | 2975,38   | 2973,49    | 1      | IC       |                  |        |
| 37  | kalata B15         | 2977,00   | 2974,56    | 1      | IC       | 2976,40          | 0,602  |
| 38  | new*               | 2986,57   | 2983,80    | 1      | I        |                  |        |
| 39  | new                | 2988,28   | 2985,60    | 1      | IC       |                  |        |
| 40  | new                | 2990,37   | 2987,51    | 1      | IC       |                  |        |
| 41  | new                | 2994,11   | 2991,86    | 1      | IC       |                  |        |
| 42  | new*               | 3006,25   | 3003,50    | 1      | IC       |                  |        |
| 43  | new*               | 3010,97   | 3008,88    | 1      | IC       |                  |        |
| 44  | kalata B14         | 3023,74   | 3021,17    | 0,9987 | I        | 3022,43          | 1,3147 |
| 45  | new*               | 3028,61   | 3025,92    | 0,9998 | I        |                  |        |
| 46  | kalata B6          | 3029,96   | 3027,66    | 0,9999 | I        | 3029,42          | 0,5381 |
| 47  | kalata B10         | 3030,21   | 3027,53    | 1      | IC       | 3030,41          | 0,2028 |
| 48  | Oak6 cyclotide 1   | 3035,87   | 3033,49    | 1      | IC       | 3035,47          | 0,398  |
| 49  | kalata B13         | 3036,06   | 3033,58    | 1      | IC       | 3036,46          | 0,4018 |
| 50  | new                | 3039,91   | 3037,45    | 1      | IC       |                  |        |
| 51  | new                | 3040,05   | 3036,62    | 1      | IC       |                  |        |
| 52  | new*               | 3045,78   | 3043,50    | 1      | IC       |                  |        |
| 53  | new*               | 3046,32   | 3044,95    | 1      | IC       |                  |        |
| 54  | new*               | 3047,97   | 3046,60    | 0,9999 | I        |                  |        |
| 55  | kalata B10 lin     | 3048,54   | 3046,50    | 1      | IC       | 3048,43          | 0,1091 |
| 56  | new*               | 3051,82   | 3048,48    | 1      | IC       |                  |        |
| 57  | new*               | 3052,72   | 3049,57    | 1      | IC       |                  |        |
| 58  | new*               | 3065,79   | 3063,36    | 0,9997 | I        |                  |        |
| 59  | kalata B7          | 3072,26   | 3069,74    | 0,9998 | I        | 3071,59          | 0,67   |
| 60  | new*               | 3073,89   | 3072,70    | 0,9999 | I        |                  |        |
| 61  | kalata B3          | 3083,31   | 3080,64    | 1      | IC       | 3082,48          | 0,8309 |
| 62  | new*               | 3087,22   | 3084,61    | 1      | IC       |                  |        |
| 63  | new                | 3089,27   | 3086,96    | 0,9997 | I        |                  |        |

|    |                  |         |         |        |    |         |        |
|----|------------------|---------|---------|--------|----|---------|--------|
| 64 | new              | 3091,00 | 3089,03 | 0,9997 | I  |         |        |
| 65 | Oak6 cyclotide 2 | 3093,29 | 3090,61 | 1      | IC | 3092,56 | 0,7328 |
| 66 | new*             | 3097,63 | 3094,57 | 1      | IC |         |        |
| 67 | new*             | 3099,85 | 3096,60 | 1      | IC |         |        |
| 68 | kalata B18**     | 3147,33 | 3145,02 | 0,9977 | I  | 3145,67 | 1,6615 |
| 69 | new*             | 3266,81 | 3264,99 | 0,9997 | I  |         |        |
| 70 | kalata B8        | 3284,34 | 3281,75 | 1      | IC | 3283,79 | 0,5453 |
| 71 | new*             | 3300,96 |         | 1      | C  |         |        |
| 72 | new              | 3446,88 | 3444,98 | 0,9998 | I  |         |        |

|               |           |
|---------------|-----------|
| <b>Total:</b> | <b>72</b> |
| <b>New:</b>   | <b>25</b> |
| <b>New*:</b>  | <b>24</b> |



**Supplemental File 2. *O. affinis* database search results following digests and LC-MS/MS analysis.** Excel spreadsheet (XLS) containing the Protein Pilot™ database search results of the cyclotide LC-MS/MS analysis. Presented as Adobe Acrobat file (PDF).

| <b>N</b> | <b>Unused</b> | <b>Total</b> | <b>%Cov</b> | <b>%Cov(50)</b> | <b>%Cov(95)</b> | <b>Accession</b> | <b>Name</b>                                                                                         | <b>Peptides(95%)</b> |
|----------|---------------|--------------|-------------|-----------------|-----------------|------------------|-----------------------------------------------------------------------------------------------------|----------------------|
| 1        | 6,43          | 6,43         | 100,00      | 85,48           | 82,26           | cb P85175        | kalata B8/1-31 cybaseid=168 organism=Oldenlandia affinis                                            | 4                    |
| 2        | 6,00          | 6,00         | 100,00      | 51,72           | 51,72           | cb P58457        | kalata B7/1-29 cybaseid=26 organism=Oldenlandia affinis                                             | 6                    |
| 3        | 5,91          | 5,91         | 100,00      | 98,28           | 96,55           | cb P58454        | kalata B2/1-29 cybaseid=4 organism=Oldenlandia affinis                                              | 4                    |
| 4        | 2,75          | 2,75         | 100,00      | 98,28           | 72,41           | cb P83938        | kalata B4/1-29 cybaseid=30 organism=Oldenlandia affinis                                             | 2                    |
| 5        | 2,63          | 2,63         | 93,33       | 88,33           | 88,33           | cb P58456        | kalata B5/1-30 cybaseid=59 organism=Oldenlandia affinis                                             | 5                    |
| 6        | 2,00          | 3,75         | 100,00      | 98,28           | 72,41           | cb P85133        | kalata B15/1-29 cybaseid=253 organism=Oldenlandia affinis                                           | 3                    |
| 7        | 2,00          | 2,00         | 100,00      | 50,00           | 50,00           | cb P85128        | kalata B10/1-30 cybaseid=246 organism=Oldenlandia affinis                                           | 1                    |
| 7        | 0,00          | 2,00         | 100,00      | 50,00           | 50,00           | cb 247           | kalata B10 linear/1-30 cybaseid=247 organism=Oldenlandia affinis                                    | 1                    |
| 8        | 2,00          | 2,00         | 85,48       | 85,48           | 43,55           | cb P85127        | kalata B9/1-31 cybaseid=244 organism=Oldenlandia affinis                                            | 1                    |
| 8        | 0,00          | 2,00         | 85,48       | 85,48           | 43,55           | cb 245           | kalata B9 linear/1-31 cybaseid=245 organism=Oldenlandia affinis                                     | 1                    |
| 9        | 2,00          | 2,00         | 98,21       | 50,00           | 50,00           | cb P85130        | kalata B12/1-28 cybaseid=250 organism=Oldenlandia affinis                                           | 2                    |
| 10       | 1,06          | 2,00         | 100,00      | 50,00           | 50,00           | cb P58455-b3     | kalata B6/1-30 cybaseid=24 organism=Oldenlandia affinis                                             | 1                    |
| 10       | 0,00          | 2,00         | 100,00      | 50,00           | 50,00           | cb 247           | kalata B10 linear/1-30 cybaseid=247 organism=Oldenlandia affinis                                    | 1                    |
| 11       | 0,63          | 2,01         | 98,28       | 98,28           | 72,41           | cb P56254        | kalata B1/1-29 cybaseid=1 organism=Viola odorata; Oldenlandia affinis; Viola baoshanensis; Viola ye | 4                    |
| 12       | 0,20          | 0,20         | 100,00      | 61,67           | 0,00            | cb P58455-b6     | kalata B3/1-30 cybaseid=25 organism=Oldenlandia affinis                                             | 0                    |

























| <b>N</b> | <b>Unused</b> | <b>Total</b> | <b>%Cov</b> | <b>%Cov(50)</b> | <b>%Cov(95)</b> | <b>Accession</b> | <b>Name</b>                                             | <b>Peptides(95%)</b> |
|----------|---------------|--------------|-------------|-----------------|-----------------|------------------|---------------------------------------------------------|----------------------|
| 1        | 0,88          | 0,88         | 100         | 87,92999983     | 0               | cb P58454        | kalata B2/1-29 cybaseid=4 organism=Oldenlandia affinis  | 0                    |
| 2        | 0,52          | 0,52         | 100         | 50              | 50              | cb P58457        | kalata B7/1-29 cybaseid=26 organism=Oldenlandia affinis | 1                    |
| 3        | 0,21          | 0,21         | 100         | 25              | 0               | cb P58455-b6     | kalata B3/1-30 cybaseid=25 organism=Oldenlandia affinis | 0                    |



|   |      |      |     |    |                                                                         |   |             |                                |                                                                                                                 |              |             |          |             |             |   |   |             |         |
|---|------|------|-----|----|-------------------------------------------------------------------------|---|-------------|--------------------------------|-----------------------------------------------------------------------------------------------------------------|--------------|-------------|----------|-------------|-------------|---|---|-------------|---------|
| 3 | 0,21 | 0,21 | 100 | 25 | 0 cb  PS8455-b6 kalata B3/1-30 cybaseid=25 organism=Olderlandia affinis | 0 | 0,003507    | TCFGGTCNTPGCTCD                | Carbamidomethyl(C)@2; Carbamidomethyl(C)@7; Carbamidomethyl(C)@12; Carbamidomethyl(C)@cleaved D-P@C-term        | 0,0259826    | 1706,605347 | 427,6586 | 1706,579346 | 427,6520996 | 4 | 3 | 1.1.1.527.3 | 62,4578 |
| 3 | 0,21 | 0,21 | 100 | 25 | 0 cb  PS8455-b6 kalata B3/1-30 cybaseid=25 organism=Olderlandia affinis | 0 | 0,003391    | TCFGGTCNTPGCTCD                | Carbamidomethyl(C)@2; Carbamidomethyl(C)@7; Carbamidomethyl(C)@12; Carbamidomethyl(C)@cleaved D-P@C-term        | 0,426373005  | 1707,005737 | 427,7587 | 1706,579346 | 427,6520996 | 4 | 3 | 2.1.1.376.4 | 68,8942 |
| 3 | 0,21 | 0,21 | 100 | 25 | 0 cb  PS8455-b6 kalata B3/1-30 cybaseid=25 organism=Olderlandia affinis | 0 | 0,002554    | TCFGGTCNTPGCTCD                | Carbamidomethyl(C)@2; Carbamidomethyl(C)@7; Carbamidomethyl(C)@12; Carbamidomethyl(C)@cleaved D-P@C-term        | 0,508404016  | 1707,087769 | 427,7792 | 1706,579346 | 427,6520996 | 4 | 3 | 1.1.1.528.4 | 62,6258 |
| 3 | 0,21 | 0,21 | 100 | 25 | 0 cb  PS8455-b6 kalata B3/1-30 cybaseid=25 organism=Olderlandia affinis | 0 | 0,002429    | TCFGGTCNTPGCTCD                | Carbamidomethyl(C)@2; Carbamidomethyl(C)@7; Carbamidomethyl(C)@12; Carbamidomethyl(C)@cleaved D-P@C-term        | 0,315533032  | 1706,894897 | 427,731  | 1706,579346 | 427,6520996 | 4 | 3 | 1.1.1.560.4 | 66,261  |
| 3 | 0,21 | 0,21 | 100 | 25 | 0 cb  PS8455-b6 kalata B3/1-30 cybaseid=25 organism=Olderlandia affinis | 0 | 0,00238     | TCFGGTCNTPGCTCD                | Carbamidomethyl(C)@2; Carbamidomethyl(C)@7; Carbamidomethyl(C)@12; Carbamidomethyl(C)@cleaved D-P@C-term        | 4,146339893  | 1710,725708 | 428,6887 | 1706,579346 | 427,6520996 | 4 | 3 | 2.1.1.436.4 | 79,0321 |
| 3 | 0,21 | 0,21 | 100 | 25 | 0 cb  PS8455-b6 kalata B3/1-30 cybaseid=25 organism=Olderlandia affinis | 0 | 0,00356     | TCFGGTCNTPGCTCD                | Carbamidomethyl(C)@2; Carbamidomethyl(C)@7; Carbamidomethyl(C)@12; Carbamidomethyl(C)@cleaved D-P@C-term        | 3,811630011  | 1710,390991 | 428,605  | 1706,579346 | 427,6520996 | 4 | 3 | 1.1.1.562.5 | 66,4919 |
| 3 | 0,21 | 0,21 | 100 | 25 | 0 cb  PS8455-b6 kalata B3/1-30 cybaseid=25 organism=Olderlandia affinis | 0 | 0,0008264   | TCFGGTCNTPGCTCD                | Carbamidomethyl(C)@2; Carbamidomethyl(C)@7; Carbamidomethyl(C)@12; Carbamidomethyl(C)@cleaved D-P@C-term        | -0,022452701 | 1706,556885 | 854,2857 | 1706,579346 | 854,296936  | 2 | 3 | 1.1.1.121.3 | 21,0624 |
| 3 | 0,21 | 0,21 | 100 | 25 | 0 cb  PS8455-b6 kalata B3/1-30 cybaseid=25 organism=Olderlandia affinis | 0 | 0,0005564   | TCFGGTCNTPGCTCD                | Carbamidomethyl(C)@2; Carbamidomethyl(C)@7; Carbamidomethyl(C)@12; Carbamidomethyl(C)@cleaved D-P@C-term        | 1,644760013  | 1708,224121 | 428,0633 | 1706,579346 | 427,6520996 | 4 | 3 | 2.1.1.324.3 | 60,3719 |
| 3 | 0,21 | 0,21 | 100 | 25 | 0 cb  PS8455-b6 kalata B3/1-30 cybaseid=25 organism=Olderlandia affinis | 0 | 0,0005812   | TCFGGTCNTPGCTCD                | Carbamidomethyl(C)@2; Carbamidomethyl(C)@7; Carbamidomethyl(C)@12; Carbamidomethyl(C)@cleaved D-P@C-term        | -0,0111002   | 1706,568237 | 854,2914 | 1706,579346 | 854,296936  | 2 | 3 | 1.1.1.155.3 | 20,999  |
| 3 | 0,21 | 0,21 | 100 | 25 | 0 cb  PS8455-b6 kalata B3/1-30 cybaseid=25 organism=Olderlandia affinis | 0 | 0,0001157   | TCFGGTCNTPGCTCD                | Carbamidomethyl(C)@2; Carbamidomethyl(C)@7; Carbamidomethyl(C)@12; Carbamidomethyl(C)@cleaved D-P@C-term        | 1,671609998  | 1708,250977 | 428,07   | 1706,579346 | 427,6520996 | 4 | 3 | 3.1.1.328.3 | 50,558  |
| 3 | 0,21 | 0,21 | 100 | 25 | 0 cb  PS8455-b6 kalata B3/1-30 cybaseid=25 organism=Olderlandia affinis | 0 | 8,25E-05    | TCFGGTCNTPGCTCD                | Carbamidomethyl(C)@2; Carbamidomethyl(C)@7; Deamidated(N)@8; Carbamidomethyl(C)@12; C-cleaved D-P@C-term        | -1,480370045 | 1706,083008 | 427,528  | 1707,563354 | 427,8881018 | 4 | 3 | 1.1.1.139.4 | 19,0583 |
| 3 | 0,21 | 0,21 | 100 | 25 | 0 cb  PS8455-b6 kalata B3/1-30 cybaseid=25 organism=Olderlandia affinis | 0 | 0,013688    | TCFGGTCNTPGCTCDPWPICTRD        | Carbamidomethyl(C)@2; Carbamidomethyl(C)@7; Carbamidomethyl(C)@12; Carbamidomethyl(C)@14; Carbamidomethyl(C)@20 | -1,055250049 | 2730,999268 | 911,3404 | 2732,054688 | 911,6921387 | 3 | 7 | 4.1.1.183.5 | 27,9217 |
| 3 | 0,21 | 0,21 | 100 | 25 | 0 cb  PS8455-b6 kalata B3/1-30 cybaseid=25 organism=Olderlandia affinis | 0 | 0,01821     | TCFGGTCNTPGCTCDPWPICTRD        | Carbamidomethyl(C)@2; Carbamidomethyl(C)@7; Carbamidomethyl(C)@12; Carbamidomethyl(C)@14; Carbamidomethyl(C)@20 | -2,06855011  | 2729,986084 | 911,0026 | 2732,054688 | 911,6921387 | 3 | 7 | 4.1.1.184.5 | 28,0711 |
| 3 | 0,21 | 0,21 | 100 | 25 | 0 cb  PS8455-b6 kalata B3/1-30 cybaseid=25 organism=Olderlandia affinis | 0 | 0,01433     | TCFGGTCNTPGCTCDPWPICTRD        | Carbamidomethyl(C)@2; Carbamidomethyl(C)@7; Carbamidomethyl(C)@12; Carbamidomethyl(C)@14; Carbamidomethyl(C)@20 | -0,147958994 | 2731,906738 | 911,6428 | 2732,054688 | 911,6921387 | 3 | 4 | 1.1.1.211.5 | 27,0104 |
| 3 | 0,21 | 0,21 | 100 | 25 | 0 cb  PS8455-b6 kalata B3/1-30 cybaseid=25 organism=Olderlandia affinis | 0 | 0,054360001 | TCFGGTCNTPGCTCDPWPICTRDGLPTCGE | Carbamidomethyl(C)@2; Carbamidomethyl(C)@7; Deamidated(N)@8; Carbamidomethyl(C)@12; C-missed D-G@23             | -0,88845998  | 3446,450195 | 1149,824 | 3447,339355 | 1150,120361 | 3 | 8 | 4.1.1.192.5 | 29,305  |
| 3 | 0,21 | 0,21 | 100 | 25 | 0 cb  PS8455-b6 kalata B3/1-30 cybaseid=25 organism=Olderlandia affinis | 0 | 0,01474     | TCFGGTCNTPGCTCDPWPICTRDGLPTCGE | Carbamidomethyl(C)@2; Carbamidomethyl(C)@7; Carbamidomethyl(C)@12; Carbamidomethyl(C)@missed D-G@23             | 0,197362006  | 3446,552246 | 1149,858 | 3446,355225 | 1149,792358 | 3 | 6 | 3.1.1.176.3 | 28,8826 |
| 3 | 0,21 | 0,21 | 100 | 25 | 0 cb  PS8455-b6 kalata B3/1-30 cybaseid=25 organism=Olderlandia affinis | 0 | 0,008241    | TCFGGTCNTPGCTCDPWPICTRDGLPTCGE | Carbamidomethyl(C)@2; Carbamidomethyl(C)@7; Carbamidomethyl(C)@12; Carbamidomethyl(C)@missed D-G@23             | 0,137669995  | 3446,492188 | 1149,838 | 3446,355225 | 1149,792358 | 3 | 5 | 1.1.1.236.3 | 29,675  |
| 3 | 0,21 | 0,21 | 100 | 25 | 0 cb  PS8455-b6 kalata B3/1-30 cybaseid=25 organism=Olderlandia affinis | 0 | 0,005676    | TCFGGTCNTPGCTCDPWPICTRDGLPTCGE | Carbamidomethyl(C)@2; Carbamidomethyl(C)@7; Carbamidomethyl(C)@12; Carbamidomethyl(C)@missed D-G@23             | 0,187107995  | 3446,543213 | 1149,855 | 3446,355225 | 1149,792358 | 3 | 6 | 1.1.1.234.3 | 29,4281 |
| 3 | 0,21 | 0,21 | 100 | 25 | 0 cb  PS8455-b6 kalata B3/1-30 cybaseid=25 organism=Olderlandia affinis | 0 | 0,0006526   | TCFGGTCNTPGCTCDPWPICTRDGLPTCGE | Carbamidomethyl(C)@2; Carbamidomethyl(C)@7; Carbamidomethyl(C)@12; Carbamidomethyl(C)@missed D-G@23             | 0,127416     | 3446,483154 | 1149,835 | 3446,355225 | 1149,792358 | 3 | 4 | 2.1.1.150.4 | 29,2597 |
| 3 | 0,21 | 0,21 | 100 | 25 | 0 cb  PS8455-b6 kalata B3/1-30 cybaseid=25 organism=Olderlandia affinis | 0 | 0,01839     | WPICTRDGLPTCGE                 | Carbamidomethyl(C)@4; Carbamidomethyl(C)@12 cleaved P-W@N-term; missed D-G@7                                    | 0,157080993  | 1660,890869 | 831,4527 | 1660,733765 | 831,3741455 | 2 | 6 | 3.1.1.177.3 | 29,0288 |



**Supplemental File 3. Cyclotide quantification data.** Excel spreadsheet (XLS) containing the data of five independent experiments of cyclotide quantification. Presented as Adobe Acrobat file (PDF).

| Identified cyclotide | MW calculated (Da) | SEM  | $\Delta$ MW (Da) | MW LC-MS reconstruct (Da) | SEM  | $\Delta$ MW (Da) | MW theoretical (Da) | RT (min) | SEM  | Area (mAU*min) | SEM  | Height (mAU) | SEM  | Rel.Area % | SEM |
|----------------------|--------------------|------|------------------|---------------------------|------|------------------|---------------------|----------|------|----------------|------|--------------|------|------------|-----|
| kalata B8            | 3283,91            | 0,15 | 0,12             | 3284,24                   | 0,19 | 0,45             | 3283,79             | 29,95    | 0,01 | 20,55          | 0,57 | 28,01        | 0,72 | 5,6        | 0,2 |
| kalata B7            | 3071,83            | 0,19 | 0,24             | 3072,27                   | 0,17 | 0,68             | 3071,59             | 37,54    | 0,04 | 7,89           | 0,22 | 41,43        | 0,21 | 2,2        | 0,1 |
| kalata B1            | 2892,27            | 0,27 | 0,06             | 2892,98                   | 0,21 | 0,65             | 2892,33             | 45,48    | 0,02 | 50,81          | 0,84 | 96,96        | 0,61 | 13,9       | 0,2 |
| kalata B6            | 3029,60            | 0,28 | 0,18             | 3029,84                   | 0,12 | 0,42             | 3029,42             | 46,50    | 0,03 | 29,63          | 0,46 | 46,88        | 0,38 | 8,1        | 0,1 |
| kalata B13           | 3035,56            | 0,20 | 0,90             | 3035,89                   | 0,12 | 0,57             | 3036,46             | 50,32    | 0,03 | 14,88          | 1,16 | 28,75        | 0,38 | 4,1        | 0,3 |
| kalata B2            | 2955,76            | 0,12 | 0,38             | 2955,90                   | 0,09 | 0,52             | 2955,38             | 51,82    | 0,03 | 72,86          | 3,17 | 103,65       | 0,86 | 20,0       | 0,6 |
| kalata B3            | 3082,72            | 0,21 | 0,24             | 3083,04                   | 0,08 | 0,55             | 3082,48             | 52,59    | 0,07 | 11,00          | 1,40 | 23,02        | 1,27 | 3,0        | 0,4 |

\*n=5, HPLC quantification (area under curve) of five independent experiments

\*\*MW average mass

\*\*\*MW calculated from +2 or +3 ion
